# Supplementary material for: The Composition of the Organic Matter Fractions of Loamy Sand after Long-Term FYM Application without Liming
Source: MDPI journal article supplement (doi:10.3390/agronomy12102385), 2022-10-01
Supplement: s1 [file s1]

Table S1. SOC, CD, HA,FA, H, HA/FA, DH contents in the topsoil layer (0-30 cm) as influenced by crop rotation, manure application and inorganic N rate in the long-term field experiment at Grabow, Poland. Treatments with the same letter are not significantly different ( $P \leq 0.05$ ), and the comparison for mean values in crop rotation is marked with a capital letter.

The obtained results were analysed statistically by means of variance analysis (using Tukey's test) and single factor regression. Statistical calculations were performed using the program Statgraphics plus). Results are the means from 3 replications.

| Crop<br>rotatio<br>n A | Manur<br>e rates<br>(t·ha <sup>-1</sup> ) | Nitrogen<br>fertilizatio<br>n (kg·ha <sup>-1</sup> ) | Soil<br>organi<br>c<br>(SOC)<br>% | Carbon<br>solutio<br>n (CD)<br>% | Humic<br>acids<br>(HA) % | Fulvic<br>acids<br>(FA) % | Humin<br>s (H) % | HA/FA<br>the<br>ratio | The degree<br>of<br>humificatio<br>n (DH) |
|------------------------|-------------------------------------------|------------------------------------------------------|-----------------------------------|----------------------------------|--------------------------|---------------------------|------------------|-----------------------|-------------------------------------------|
|                        | 0                                         | 0                                                    | 0,51a                             | 2,5b                             | 24,9a                    | 17,1a                     | 55,5c            | 1,46b                 | 0,76a                                     |
|                        | 0                                         | 100                                                  | 0,56a                             | 2a                               | 25,3a                    | 17,7a                     | 55c              | 1,43b                 | 0,78a                                     |
|                        | 0                                         | 150                                                  | 0,57a                             | 2,6b                             | 25,4a                    | 18,9b                     | 53,1b            | 1,34a                 | 0,83b                                     |
|                        | Mean                                      |                                                      | 0,55                              | 2,4                              | 25,2                     | 17,9                      | 54,5             | 1,41                  | 0,79                                      |
|                        | 20                                        | 0                                                    | 0,58b                             | 2,3a                             | 25,9a                    | 17,1a                     | 54,7c            | 1,51b                 | 0,79a                                     |
|                        | 20                                        | 100                                                  | 0,59b                             | 2,3a                             | 26,5a                    | 17,3a                     | 53,9bc           | 1,53cb                | 0,81ba                                    |
|                        | 20                                        | 150                                                  | 0,65b                             | 2,3a                             | 27,2b                    | 17,8a                     | 52,7bc           | 1,53cb                | 0,85b                                     |
|                        | Mean                                      |                                                      | 0,61                              | 2,3                              | 26,5                     | 17,4                      | 53,4             | 1,52                  | 0,82                                      |
|                        | 40                                        | 0                                                    | 0,62b                             | 2,3a                             | 28,5b                    | 17,8a                     | 51,4bc           | 1,60c                 | 0,90cb                                    |
|                        | 40                                        | 100                                                  | 0,63b                             | 2,3a                             | 28,4b                    | 19,3b                     | 50b              | 1,47b                 | 0,95c                                     |
|                        | 40                                        | 150                                                  | 0,64b                             | 2,3a                             | 29,1b                    | 19,8b                     | 48,8b            | 1,47b                 | 1,00c                                     |
|                        | Mean                                      |                                                      | 0,63                              | 2,3                              | 28,7                     | 18,9                      | 50,1             | 1,52                  | 0,95                                      |
|                        | Overall mean                              |                                                      | 0,6A                              | 2,3A                             | 26,8A                    | 18,1A                     | 52,7B            | 1,48A                 | 0,85A                                     |
|                        | Crop<br>rotation<br>B                     | 0                                                    | 0                                 | 0,73c                            | 2,5b                     | 30,2b                     | 20,1b            | 47,2b                 | 1,50cb                                    |
| 0                      |                                           | 100                                                  | 0,8d                              | 2,6b                             | 33c                      | 20,6b                     | 43,8a            | 1,60c                 | 1,22e                                     |
| 0                      |                                           | 150                                                  | 0,8d                              | 2,3a                             | 32,5c                    | 20b                       | 45,2a            | 1,63dc                | 1,16d                                     |
| Mean                   |                                           | 0,78                                                 | 2,5                               | 31,9                             | 20,2                     | 45,5                      | 1,58             | 1,15                  |                                           |
| 20                     |                                           | 0                                                    | 0,81d                             | 2a                               | 31,4bc                   | 18,1a                     | 48,5b            | 1,73d                 | 1,02d                                     |
| 20                     |                                           | 100                                                  | 0,83d                             | 2,1a                             | 31,7bc                   | 19,2b                     | 47cb             | 1,65dc                | 1,08d                                     |
| 20                     |                                           | 150                                                  | 0,88d                             | 2,2a                             | 35,6d                    | 18,2a                     | 44a              | 1,96e                 | 1,22e                                     |
| Mean                   |                                           | 0,84                                                 | 2,1                               | 32,9                             | 18,5                     | 46,5                      | 1,78             | 1,11                  |                                           |
| 40                     |                                           | 0                                                    | 0,82d                             | 2a                               | 29b                      | 19,9b                     | 49,1b            | 1,46b                 | 1,00c                                     |
| 40                     |                                           | 100                                                  | 0,83d                             | 2,1a                             | 28,8b                    | 20,2b                     | 48,9b            | 1,43b                 | 1,00c                                     |
| 40                     |                                           | 150                                                  | 0,87d                             | 2a                               | 31,6bc                   | 20,1b                     | 46,3b            | 1,57c                 | 1,12d                                     |
| Mean                   |                                           | 0,84                                                 | 2,03                              | 29,80                            | 20,07                    | 48,10                     | 1,49             | 1,04                  |                                           |
| Overall mean           |                                           | 0,82B                                                | 2,21A                             | 31,53B                           | 19,59B                   | 46,70A                    | 1,61B            | 1,10B                 |                                           |
| LSD                    |                                           |                                                      | 0,063                             | 0,49                             | 1,51                     | 1,07                      | 1,61             | 0,08                  | 0,049                                     |

Table S2. pH (KCl) contents in in the topsoil layer (0-30 cm) as influenced by crop rotation, manure application and inorganic N rate in the long-term field experiment at Grabow, Poland. Treatments with the same letter are not significantly different ( $P \leq 0.05$ ), and the comparison for mean values in crop rotation is marked with a capital letter.

The obtained results were analyzed statistically by means of variance analysis (using Tukey's test) and single factor regression. Statistical calculations were performed using the program Statgraphics plus). Results are the means from 3 replications.

| Crop rotation A | Manure rates (t·ha <sup>-1</sup> ) | Nitrogen fertilization (kg·ha <sup>-1</sup> ) | pH   |
|-----------------|------------------------------------|-----------------------------------------------|------|
|                 | 0                                  | 0                                             | 5,6a |
|                 | 0                                  | 100                                           | 5,7a |
|                 | 0                                  | 150                                           | 5,6a |
|                 | Mean                               |                                               | 5,6  |
|                 | 20                                 | 0                                             | 5,9b |
|                 | 20                                 | 100                                           | 6,1b |
|                 | 20                                 | 150                                           | 6,2b |
|                 | Mean                               |                                               | 6,07 |
|                 | 40                                 | 0                                             | 6,2b |
|                 | 40                                 | 100                                           | 6,0b |
|                 | 40                                 | 150                                           | 6,0b |
|                 | Mean                               |                                               | 6,07 |
|                 | Overall mean                       |                                               | 5,9B |
|                 | Crop rotation B                    | 0                                             | 0    |
| 0               |                                    | 100                                           | 5,4a |
| 0               |                                    | 150                                           | 5,5a |
| Mean            |                                    | 5,47                                          |      |
| 20              |                                    | 0                                             | 5,6a |
| 20              |                                    | 100                                           | 5,7a |
| 20              |                                    | 150                                           | 5,4a |
| Mean            |                                    | 5,57                                          |      |
| 40              |                                    | 0                                             | 5,7a |
| 40              |                                    | 100                                           | 5,5a |
| 40              |                                    | 150                                           | 5,5a |
| Mean            |                                    | 5,57                                          |      |
| Overall mean    |                                    | 5,54A                                         |      |
| LSD             |                                    |                                               | 0,25 |
